# Supplementary material
Source: HighWire-hosted journal article supplement (http://www.ajnr.org/highwire/filestream/77006/field_highwire_adjunct_files/0/19-01190.pdf)
Supplement: 19-01190.pdf [file 19-01190.pdf]

**On-line Table: Summary of susceptibility contrast ratios of the 15 nuclei relative to that of the centromedian nucleus**

| Nucleus                                            | Contrast Ratio (Mean) |
|----------------------------------------------------|-----------------------|
| Centromedian (CM)                                  | 1                     |
| Subthalamic (STh)                                  | 0.62 ± 0.17           |
| Lateral pulvinar (PuL)                             | 0.87 ± 0.09           |
| Central medial (CeM)                               | 0.92 ± 0.08           |
| Ventral medial (VM)                                | 0.95 ± 0.08           |
| Ventral lateral posterior, ventral division (VLpv) | 1.04 ± 0.06           |
| Ventral lateral anterior (VLa)                     | 1.10 ± 0.10           |
| Anterior pulvinar (PuA)                            | 1.17 ± 0.13           |
| Ventral lateral posterior, dorsal division (VLpd)  | 1.17 ± 0.15           |
| Medial geniculate (MGN)                            | 1.18 ± 0.19           |
| Ventral posterior lateral (VPL)                    | 1.29 ± 0.11           |
| Ventral posterior medial (VPM)                     | 1.29 ± 0.13           |
| Ventral anterior (VA)                              | 1.32 ± 0.09           |
| Mediodorsal (MD)                                   | 1.41 ± 0.20           |
| Medial pulvinar (PuM)                              | 1.79 ± 0.31           |

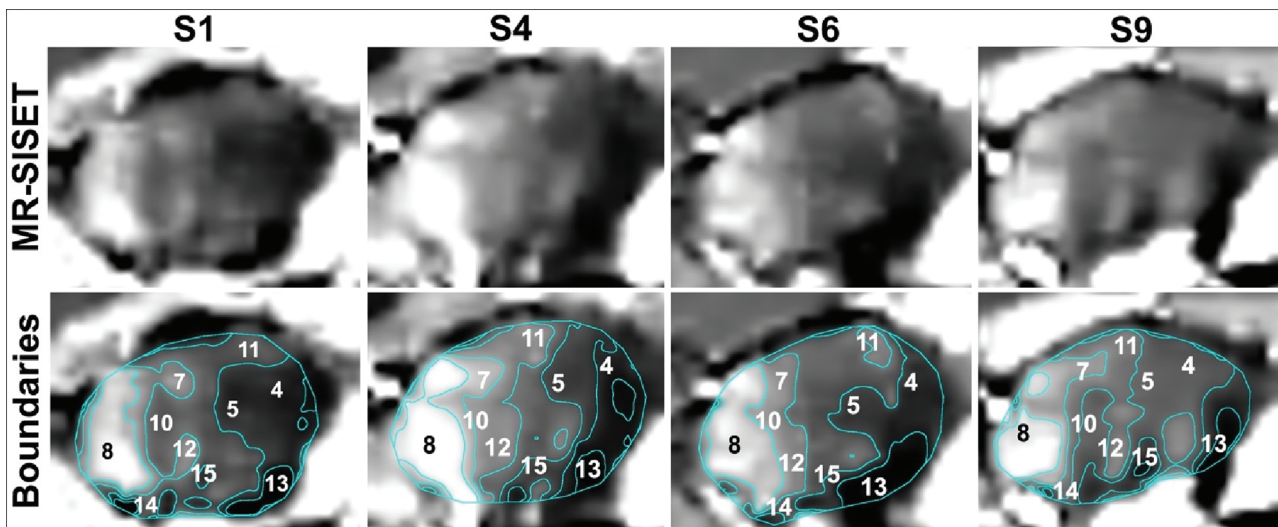

**ON-LINE FIGURE.** MR-SISET maps with corresponding boundaries derived from K-mean clustering for 4 representative subjects in the sagittal plane, showing clear similarities between subjects with several consistently segmented subregions. S indicates subject.
